# Supplementary material for: Assessing Voice Hearing in Trauma Spectrum Disorders: A Comparison of Two Measures and a Review of the Literature
Source: PubMed Central journal article supplement (PMC7050446; doi:10.3389/fpsyt.2019.01011), 2020-02-24
Supplement: DataSheet_1.pdf [file DataSheet_1.pdf]

**Supplementary Table 1. Inventory of Childhood Abuse**

| Type of Childhood Abuse                                                                       |                | All             | Unequivocal<br>VH +<br>(B16 + / MID +) | Ambiguous<br>VH +<br>(B16 - / MID +) | Unequivocal<br>VH -<br>(B16 - / MID -) | Statistic        | Significance |
|-----------------------------------------------------------------------------------------------|----------------|-----------------|----------------------------------------|--------------------------------------|----------------------------------------|------------------|--------------|
|                                                                                               |                | N=70            | N=32                                   | N=32                                 | N=6                                    |                  |              |
| Verbally abused as a child, No. (%)                                                           | Yes            | 48 (69%)        | 20 (71%)                               | 22 (85%)                             | 6 (100%)                               | $\chi^2 = 3.132$ | $p = 0.209$  |
|                                                                                               | No             | 12 (17%)        | 8 (29%)                                | 4 (15%)                              | 0 (0%)                                 |                  |              |
|                                                                                               | Missing        | 4 (6%)          |                                        |                                      |                                        |                  |              |
| Beaten or physically punished (excluding spanking) as a child, No. (%)                        | Yes            | 45 (64%)        | 20 (67%)                               | 21 (70%)                             | 4 (67%)                                | $\chi^2 = 0.084$ | $p = 0.959$  |
|                                                                                               | No             | 21 (30%)        | 10 (33%)                               | 9 (30%)                              | 2 (32%)                                |                  |              |
|                                                                                               | Missing        | 4 (6%)          |                                        |                                      |                                        |                  |              |
| Attacked with a gun/knife/other weapon by intimate partner at age < 18y, No. (%)†             | Yes            | 1 (1%)          | 0 (0%)                                 | 1 (3%)                               | 0 (0%)                                 | -                | -            |
|                                                                                               | No             | 63 (90%)        | 30 (100%)                              | 27 (97%)                             | 6 (100%)                               |                  |              |
|                                                                                               | Missing        | 6 (9%)          |                                        |                                      |                                        |                  |              |
| Attacked with a gun/knife/other weapon by someone other than intimate partner < 18y, No. (%)† | Yes            | 17 (24%)        | 8 (27%)                                | 8 (27%)                              | 1 (17%)                                | $\chi^2 = 0.285$ | $p = 0.867$  |
|                                                                                               | No             | 49 (70%)        | 22 (73%)                               | 22 (73%)                             | 5 (83%)                                |                  |              |
|                                                                                               | Missing        | 4 (6%)          |                                        |                                      |                                        |                  |              |
| Attacked without a weapon by intimate partner at age < 18y, No. (%)††                         | Yes            | 7 (10%)         | 2 (7%)                                 | 5 (17%)                              | 0 (0%)                                 | $\chi^2 = 2.514$ | $p = 0.285$  |
|                                                                                               | No             | 58 (83%)        | 28 (93%)                               | 24 (83%)                             | 6 (100%)                               |                  |              |
|                                                                                               | Missing        | 5 (7%)          |                                        |                                      |                                        |                  |              |
| Attacked without a weapon by someone other than intimate partner at age < 18y, No. (%)††      | Yes            | 38 (54%)        | 18 (60%)                               | 17 (57%)                             | 3 (50%)                                | $\chi^2 = 0.223$ | $p = 0.894$  |
|                                                                                               | No             | 28 (40%)        | 12 (40%)                               | 13 (43%)                             | 3 (50%)                                |                  |              |
|                                                                                               | Missing        | 4 (6%)          |                                        |                                      |                                        |                  |              |
| Sexually abused between ages 0-13y, No. (%)†††                                                | Yes            | 54 (77%)        | 26 (90%)                               | 24 (80%)                             | 4 (67%)                                | $\chi^2 = 2.244$ | $p = 0.326$  |
|                                                                                               | No             | 11 (16%)        | 3 (10%)                                | 6 (20%)                              | 2 (33%)                                |                  |              |
|                                                                                               | Missing        | 5 (7%)          |                                        |                                      |                                        |                  |              |
| Sexually abused between ages 14-17y, No. (%)†††                                               | Yes            | 34 (49%)        | 18 (64%)                               | 14 (47%)                             | 2 (33%)                                | $\chi^2 = 2.847$ | $p = 0.241$  |
|                                                                                               | No             | 30 (43%)        | 10 (36%)                               | 16 (53%)                             | 4 (67%)                                |                  |              |
|                                                                                               | Missing        | 6 (9%)          |                                        |                                      |                                        |                  |              |
| Total number, types of childhood abuse, mean ± SD (range)                                     | Missing in n=4 | 3.7 ± 1.5 (1-7) | 3.7 ± 1.4 (1-6)                        | 3.7 ± 1.6 (1-7)                      | 3.3 ± 1.6 (1-5)                        | $F = 0.182$      | $p = 0.834$  |

† Total number of patients with a history of attack with a gun/knife/other weapon in childhood irrespective of whether attacked by intimate partner or other is n=18 (8 unequivocal VH+, 9 ambiguous VH+, 1 unequivocal VH-).

†† Total number of patients with a history of attack without a weapon in childhood irrespective of whether attacked by intimate partner or other is n=43 (19 unequivocal VH+, 21 ambiguous VH+, 3 unequivocal VH-).

††† Total number of patients with any sexual abuse in childhood (ages 0-13 and ages 14-17 combined) is n=57 (28 unequivocal VH+, 24 ambiguous VH+, 5 unequivocal VH-).

**Supplementary Table 2. Average First Ages and Durations of Childhood Abuse**

| Type of Childhood Abuse                                                                    | All                          | Unequivocal VH +<br>(B16 +/ MID +) | Ambiguous VH +<br>(B16 - / MID +) | Unequivocal VH -<br>(B16 - / MID -) | Statistic        | Significance             |
|--------------------------------------------------------------------------------------------|------------------------------|------------------------------------|-----------------------------------|-------------------------------------|------------------|--------------------------|
| <b>Verbally abused as a child</b>                                                          |                              |                                    |                                   |                                     |                  |                          |
| First age, y, mean ± SD (range) <sup>1</sup>                                               | 5.3 ± 3.3 (1-15)<br>(N=46)   | 5.3 ± 2.9 (1-15)<br>(n=18)         | 5.3 ± 3.9 (1-15)<br>(n=22)        | 5.0 ± 1.8 (3-8)<br>(n=6)            | <i>F</i> = 0.022 | <i>p</i> = 0.978         |
| Duration, y, mean ± SD (range) <sup>2</sup>                                                | 16.5 ± 10.1 (1-53)<br>(N=42) | 17.6 ± 12.1 (3-53)<br>(n=15)       | 15.5 ± 9.6 (1-45)<br>(n=21)       | 17.3 ± 6.9 (9-26)<br>(n=6)          | <i>F</i> = 0.208 | <i>p</i> = 0.813         |
| <b>Beaten or physically punished as a child</b>                                            |                              |                                    |                                   |                                     |                  |                          |
| First age, y, mean ± SD (range) <sup>3</sup>                                               | 5.1 ± 2.7 (2-14)<br>(N= 41)  | 4.7 ± 1.6 (2-8)<br>(n=17)          | 4.5 ± 2.1 (2-10)<br>(n=20)        | 9.5 ± 5.3 (4-14)<br>(n=4)           | <i>F</i> = 7.988 | <i>p</i> = <b>0.001*</b> |
| Duration, y, mean ± SD (range) <sup>4</sup>                                                | 10.8 ± 5.6 (0-25)<br>(N=39)  | 12.0 ± 5.9 (3-25)<br>(n=16)        | 10.2 ± 4.9 (0-16)<br>(n=19)       | 9.0 ± 8.4 (2-19)<br>(n=4)           | <i>F</i> = 0.680 | <i>p</i> = 0.513         |
| <b>Attacked with a gun/knife/other weapon by intimate partner at age &lt; 18y</b>          |                              |                                    |                                   |                                     |                  |                          |
| First age, y, mean ± SD (range)                                                            | 13<br>(N=1)                  | -                                  | -                                 | -                                   | -                | -                        |
| Duration, y, mean ± SD (range)†                                                            | -                            | -                                  | -                                 | -                                   | -                | -                        |
| <b>Attacked with gun/knife/other weapon by other than intimate partner at age &lt; 18y</b> |                              |                                    |                                   |                                     |                  |                          |
| First age, y, mean ± SD (range) <sup>1</sup>                                               | 8.1 ± 3.8 (3-14)<br>(N=17)   | 10.0 ± 2.8 (5-14)<br>(n=8)         | 6.6 ± 4.1 (3-14)<br>(n=8)         | 5<br>(n=1)                          | <i>F</i> = 2.250 | <i>p</i> = 0.142         |
| Duration, y, mean ± SD (range)†                                                            | -                            | -                                  | -                                 | -                                   | -                | -                        |
| <b>Attacked without a weapon by intimate partner at age &lt; 18y</b>                       |                              |                                    |                                   |                                     |                  |                          |
| First age, y, mean ± SD (range) <sup>1</sup>                                               | 14.3 ± 2.6 (10-17)<br>(N=7)  | 15.0 ± 2.8 (13-17)<br>(n=2)        | 14.0 ± 2.7 (10-17)<br>(n=5)       | -<br>(n=0)                          | <i>F</i> = 0.188 | <i>p</i> = 0.683         |
| Duration, y, mean ± SD (range)†                                                            | -                            | -                                  | -                                 | -                                   | -                | -                        |
| <b>Attacked without a weapon by someone other than intimate partner at age &lt; 18y</b>    |                              |                                    |                                   |                                     |                  |                          |
| First age, y, mean ± SD (range) <sup>1</sup>                                               | 6.9 ± 4.1 (2-16)<br>(N=38)   | 7.0 ± 4.0 (2-15)<br>(n=18)         | 6.6 ± 4.2 (2-16)<br>(n=17)        | 8.0 ± 5.3 (4-14)<br>(n=3)           | <i>F</i> = 0.141 | <i>p</i> = 0.869         |
| Duration, y, mean ± SD (range)†                                                            | -                            | -                                  | -                                 | -                                   | -                | -                        |
| <b>Sexually abused as a child (ages 0-17y)</b>                                             |                              |                                    |                                   |                                     |                  |                          |
| First age, y, mean ± SD (range) <sup>5</sup>                                               | 5.6 ± 3.3 (2-17)<br>(N=50)   | 6.0 ± 3.6 (3-15)<br>(n=24)         | 4.8 ± 1.9 (2-9)<br>(n=22)         | 7.8 ± 6.2 (4-17)<br>(n=4)           | <i>F</i> = 1.729 | <i>p</i> = 0.189         |
| Duration, y, mean ± SD (range) <sup>6</sup>                                                | 8.0 ± 5.1 (0-21)<br>(N=46)   | 8.3 ± 6.2 (0-21)<br>(n=21)         | 8.3 ± 4.1 (0-16)<br>(n=21)        | 4.3 ± 3.3 (0-8)<br>(n=4)            | <i>F</i> = 1.156 | <i>p</i> = 0.324         |

<sup>1</sup> Info about first age of verbal abuse missing in 2 of 48 patients (2 unequivocal VH+) who reported childhood verbal abuse.

<sup>2</sup> Info about duration of verbal abuse missing in 6 of 48 patients (5 unequivocal VH+, 1 ambiguous VH+) who reported childhood verbal abuse.

<sup>3</sup> Info about first age of physical abuse missing in 4 of 45 patients (3 unequivocal VH+, 1 ambiguous VH+) who reported childhood physical abuse.

<sup>4</sup> Info about duration of physical abuse missing in 6 of 45 patients (4 unequivocal VH+, 2 ambiguous VH+) who reported childhood physical abuse.

<sup>5</sup> Info about first age of sexual abuse missing in 7 of 57 patients (4 unequivocal VH+, 2 ambiguous VH+, 1 unequivocal VH-) who reported sexual abuse in ages 0-17 years.

<sup>6</sup> Info about duration of sexual abuse missing in 11 of 57 patients (7 unequivocal VH+, 3 ambiguous VH+, 1 unequivocal VH-) who reported sexual abuse in ages 0-17 years.

† The Traumatic Events Inventory (TEI) does not assess the last age at which a patient experienced an attack with or without a weapon, thus preventing calculation of duration of exposure for these events.

\*Post-hoc comparisons using Tukey's test for multiple comparisons correction shows statistically significant differences between the unequivocal VH- group and the unequivocal VH+ group ( $p = 0.002$ ), and between the unequivocal VH- group and the ambiguous VH+ group ( $p = 0.001$ ).

**Supplementary Table 3. Perpetrators of Verbal, Physical, or Sexual Abuse in Childhood**

| Perpetrator                                                                       | All                    | Unequivocal VH +<br>(B16 + / MID +) | Ambiguous VH +<br>(B16 - / MID +) | Unequivocal VH -<br>(B16 - / MID -) | Statistic        | Significance |
|-----------------------------------------------------------------------------------|------------------------|-------------------------------------|-----------------------------------|-------------------------------------|------------------|--------------|
|                                                                                   | N=65†                  | N=30†                               | N=29†                             | N=6                                 |                  |              |
| <b>Primary caregiver, No. (%)</b>                                                 | 55 (85%)               | 24 (80%)                            | 25 (86%)                          | 6 (100%)                            | $\chi^2 = 1.638$ | $p = 0.441$  |
| Mother/female primary caregiver                                                   | 40 (62%)               | 17 (57%)                            | 18 (62%)                          | 5 (83%)                             | $\chi^2 = 1.508$ | $p = 0.470$  |
| Father/male primary caregiver                                                     | 38 (59%)               | 17 (57%)                            | 17 (59%)                          | 4 (67%)                             | $\chi^2 = 0.206$ | $p = 0.902$  |
| <b>Other family, non-primary caregivers, No. (%)</b>                              | 41 (63%)               | 18 (60%)                            | 19 (66%)                          | 4 (67%)                             | $\chi^2 = 0.229$ | $p = 0.892$  |
| Stepparent or Partner of Parent                                                   | 8 (12%)                | 4 (13%)                             | 3 (10%)                           | 1 (17%)                             | $\chi^2 = 0.238$ | $p = 0.888$  |
| Other adult family                                                                | 26 (40%)               | 11 (37%)                            | 11 (38%)                          | 4 (67%)                             | $\chi^2 = 1.968$ | $p = 0.374$  |
| Older sibling                                                                     | 18 (28%)               | 8 (27%)                             | 10 (35%)                          | 0 (0%)                              | $\chi^2 = 2.981$ | $p = 0.225$  |
| <b>Non-family, No. (%)</b>                                                        | 42 (65%)               | 20 (67%)                            | 19 (66%)                          | 3 (50%)                             | $\chi^2 = 0.626$ | $p = 0.731$  |
| Other adult, known                                                                | 24 (37%)               | 11 (37%)                            | 11 (38%)                          | 2 (33%)                             | $\chi^2 = 0.047$ | $p = 0.977$  |
| Other adult, stranger                                                             | 17 (26%)               | 9 (30%)                             | 7 (24%)                           | 1 (17%)                             | $\chi^2 = 0.570$ | $p = 0.752$  |
| Other                                                                             | 20 (31%)               | 6 (20%)                             | 12 (41%)                          | 2 (33%)                             | $\chi^2 = 3.184$ | $p = 0.203$  |
| <b>Total number of abusers during childhood, mean <math>\pm</math> SD (range)</b> | 2.9 $\pm$ 1.5<br>(1-7) | 2.8 $\pm$ 1.3<br>(1-5)              | 3.1 $\pm$ 1.8<br>(1-7)            | 3.2 $\pm$ 1.2<br>(2-5)              | $F = 0.369$      | $p = 0.693$  |

†N's reflect the number for whom TEI data on perpetrators of childhood verbal abuse, physical beatings, and sexual abuse are available. This information is not applicable for one patient (ambiguous VH+) who reported no childhood verbal abuse, physical beatings, or sexual abuse; this patient reported a history of being attacked without a weapon by someone other than intimate partner at age 16. The TEI does not systematically inquire about specific perpetrators for questions related to history of being attacked. Data are missing for four of the 70 total patients (2 unequivocal VH+, 2 ambiguous VH+).

**Supplementary Table 4. Traumatic Events Inventory for Lifetime Trauma**

| Traumatic Event                                                                               |         | All      | Unequivocal<br>VH +<br>(B16 + / MID +) | Ambiguous<br>VH +<br>(B16 - / MID +) | Unequivocal<br>VH -<br>(B16 - / MID -) | Statistic        | Significance |
|-----------------------------------------------------------------------------------------------|---------|----------|----------------------------------------|--------------------------------------|----------------------------------------|------------------|--------------|
|                                                                                               |         | N=70     | N=32                                   | N=32                                 | N=6                                    |                  |              |
| <b>Witnessed violence between parents as a child, No. (%)</b>                                 | Yes     | 37 (53%) | 16 (53%)                               | 19 (63%)                             | 2 (33%)                                | $\chi^2 = 1.993$ | $p = 0.369$  |
|                                                                                               | No      | 29 (41%) | 14 (47%)                               | 11 (37%)                             | 4 (67%)                                |                  |              |
|                                                                                               | Missing | 4 (6%)   |                                        |                                      |                                        |                  |              |
| <b>Verbally abused as a child, No. (%)</b>                                                    | Yes     | 48 (69%) | 20 (71%)                               | 22 (85%)                             | 6 (100%)                               | $\chi^2 = 3.132$ | $p = 0.209$  |
|                                                                                               | No      | 12 (17%) | 8 (29%)                                | 4 (15%)                              | 0 (0%)                                 |                  |              |
|                                                                                               | Missing | 4 (6%)   |                                        |                                      |                                        |                  |              |
| <b>Beaten or physically punished (excluding spanking) as a child, No. (%)</b>                 | Yes     | 45 (64%) | 20 (67%)                               | 21 (70%)                             | 4 (67%)                                | $\chi^2 = 0.084$ | $p = 0.959$  |
|                                                                                               | No      | 21 (30%) | 10 (33%)                               | 9 (30%)                              | 2 (32%)                                |                  |              |
|                                                                                               | Missing | 4 (6%)   |                                        |                                      |                                        |                  |              |
| <b>Sexually abused between ages 0-13y, No. (%)†</b>                                           | Yes     | 54 (77%) | 26 (90%)                               | 24 (80%)                             | 4 (67%)                                | $\chi^2 = 2.244$ | $p = 0.326$  |
|                                                                                               | No      | 11 (16%) | 3 (10%)                                | 6 (20%)                              | 2 (33%)                                |                  |              |
|                                                                                               | Missing | 5 (7%)   |                                        |                                      |                                        |                  |              |
| <b>Sexually abused between ages 14-17y, No. (%)†</b>                                          | Yes     | 34 (49%) | 18 (64%)                               | 14 (47%)                             | 2 (33%)                                | $\chi^2 = 2.847$ | $p = 0.241$  |
|                                                                                               | No      | 30 (43%) | 10 (36%)                               | 16 (53%)                             | 4 (67%)                                |                  |              |
|                                                                                               | Missing | 6 (9%)   |                                        |                                      |                                        |                  |              |
| <b>Raped or sexually assaulted after age 17, No. (%)</b>                                      | Yes     | 38 (54%) | 18 (67%)                               | 16 (62%)                             | 4 (67%)                                | $\chi^2 = 0.167$ | $p = 0.920$  |
|                                                                                               | No      | 21 (30%) | 9 (33%)                                | 10 (39%)                             | 2 (33%)                                |                  |              |
|                                                                                               | Missing | 11 (16%) |                                        |                                      |                                        |                  |              |
| <b>Witnessed murder of close friend or family, No. (%)</b>                                    | Yes     | 1 (1%)   | 0 (0%)                                 | 1 (3%)                               | 0 (0%)                                 | $\chi^2 = 1.218$ | $p = 0.544$  |
|                                                                                               | No      | 65 (93%) | 30 (100%)                              | 29 (97%)                             | 6 (100%)                               |                  |              |
|                                                                                               | Missing | 4 (6%)   |                                        |                                      |                                        |                  |              |
| <b>Confronted with knowledge of murder of close friend or family, No. (%)</b>                 | Yes     | 11 (16%) | 3 (10%)                                | 7 (23%)                              | 1 (17%)                                | $\chi^2 = 1.920$ | $p = 0.383$  |
|                                                                                               | No      | 55 (79%) | 27 (90%)                               | 23 (77%)                             | 5 (83%)                                |                  |              |
|                                                                                               | Missing | 4 (6%)   |                                        |                                      |                                        |                  |              |
| <b>Attacked with a gun/knife/other weapon by intimate partner, No. (%)</b>                    | Yes     | 6 (9%)   | 3 (10%)                                | 2 (7%)                               | 1 (17%)                                | $\chi^2 = 0.553$ | $p = 0.758$  |
|                                                                                               | No      | 58 (83%) | 27 (90%)                               | 26 (93%)                             | 5 (83%)                                |                  |              |
|                                                                                               | Missing | 6 (9%)   |                                        |                                      |                                        |                  |              |
| <b>Attacked with a gun/knife/other weapon by someone other than intimate partner, No. (%)</b> | Yes     | 30 (43%) | 15 (50%)                               | 13 (43%)                             | 2 (33%)                                | $\chi^2 = 0.660$ | $p = 0.719$  |
|                                                                                               | No      | 36 (51%) | 15 (50%)                               | 17 (57%)                             | 4 (67%)                                |                  |              |
|                                                                                               | Missing | 4 (6%)   |                                        |                                      |                                        |                  |              |
| <b>Witnessed family/friend attacked with a gun/knife/other weapon, No. (%)</b>                | Yes     | 17 (24%) | 4 (14%)                                | 11 (38%)                             | 2 (33%)                                | $\chi^2 = 4.487$ | $p = 0.106$  |
|                                                                                               | No      | 47 (67%) | 25 (87%)                               | 18 (62%)                             | 4 (67%)                                |                  |              |
|                                                                                               | Missing | 6 (9%)   |                                        |                                      |                                        |                  |              |

|                                                                                                   |                |                         |                          |                         |                         |                  |             |
|---------------------------------------------------------------------------------------------------|----------------|-------------------------|--------------------------|-------------------------|-------------------------|------------------|-------------|
| <b>Witnessed someone other than family/friend attacked with a gun/knife/other weapon, No. (%)</b> | Yes            | 13 (19%)                | 6 (20%)                  | 6 (21%)                 | 1 (20%)                 | $\chi^2 = 0.005$ | $p = 0.998$ |
|                                                                                                   | No             | 51 (73%)                | 24 (80%)                 | 23 (79%)                | 4 (80%)                 |                  |             |
|                                                                                                   | Missing        | 6 (9%)                  |                          |                         |                         |                  |             |
| <b>Attacked without a weapon by intimate partner, No. (%)</b>                                     | Yes            | 25 (36%)                | 10 (33%)                 | 14 (48%)                | 1 (17%)                 | $\chi^2 = 2.718$ | $p = 0.257$ |
|                                                                                                   | No             | 40 (57%)                | 20 (67%)                 | 15 (52%)                | 5 (83%)                 |                  |             |
|                                                                                                   | Missing        | 5 (7%)                  |                          |                         |                         |                  |             |
| <b>Attacked without a weapon by someone other than intimate partner, No. (%)</b>                  | Yes            | 49 (70%)                | 25 (83%)                 | 19 (63%)                | 5 (83%)                 | $\chi^2 = 3.423$ | $p = 0.181$ |
|                                                                                                   | No             | 17 (24%)                | 5 (17%)                  | 11 (37%)                | 1 (17%)                 |                  |             |
|                                                                                                   | Missing        | 4 (6%)                  |                          |                         |                         |                  |             |
| <b>Witnessed family/friend attacked without a weapon, No. (%)</b>                                 | Yes            | 38 (54%)                | 13 (43%)                 | 20 (67%)                | 5 (83%)                 | $\chi^2 = 5.136$ | $p = 0.077$ |
|                                                                                                   | No             | 28 (40%)                | 17 (57%)                 | 10 (33%)                | 1 (17%)                 |                  |             |
|                                                                                                   | Missing        | 4 (6%)                  |                          |                         |                         |                  |             |
| <b>Witnessed someone other than family/friend attacked without a weapon, No. (%)</b>              | Yes            | 21 (30%)                | 7 (25%)                  | 11 (38%)                | 3 (50%)                 | $\chi^2 = 1.901$ | $p = 0.387$ |
|                                                                                                   | No             | 42 (60%)                | 21 (75%)                 | 18 (62%)                | 3 (50%)                 |                  |             |
|                                                                                                   | Missing        | 7 (10%)                 |                          |                         |                         |                  |             |
| <b>Experienced a natural disaster, No. (%)</b>                                                    | Yes            | 20 (29%)                | 11 (37%)                 | 7 (23%)                 | 2 (33%)                 | $\chi^2 = 1.483$ | $p = 0.476$ |
|                                                                                                   | No             | 47 (67%)                | 19 (63%)                 | 24 (78%)                | 4 (67%)                 |                  |             |
|                                                                                                   | Missing        | 3 (3%)                  |                          |                         |                         |                  |             |
| <b>Experienced a serious accident or injury, No. (%)</b>                                          | Yes            | 27 (39%)                | 11 (38%)                 | 13 (42%)                | 3 (50%)                 | $\chi^2 = 0.325$ | $p = 0.850$ |
|                                                                                                   | No             | 39 (56%)                | 18 (62%)                 | 18 (58%)                | 3 (50%)                 |                  |             |
|                                                                                                   | Missing        | 4 (6%)                  |                          |                         |                         |                  |             |
| <b>Witnessed a serious accident or injury, No. (%)</b>                                            | Yes            | 37 (53%)                | 15 (50%)                 | 18 (58%)                | 4 (67%)                 | $\chi^2 = 0.750$ | $p = 0.687$ |
|                                                                                                   | No             | 30 (43%)                | 15 (50%)                 | 13 (42%)                | 2 (33%)                 |                  |             |
|                                                                                                   | Missing        | 3 (4%)                  |                          |                         |                         |                  |             |
| <b>Experienced a sudden life-threatening illness, No. (%)</b>                                     | Yes            | 12 (17%)                | 6 (20%)                  | 6 (19%)                 | 0 (0%)                  | $\chi^2 = 1.442$ | $p = 0.486$ |
|                                                                                                   | No             | 55 (79%)                | 24 (80%)                 | 25 (81%)                | 6 (100%)                |                  |             |
|                                                                                                   | Missing        | 3 (4%)                  |                          |                         |                         |                  |             |
| <b>Been in military combat/service in a war zone, No. (%)</b>                                     | Yes            | 0 (0%)                  | 0 (0%)                   | 0 (0%)                  | 0 (0%)                  | -                | -           |
|                                                                                                   | No             | 66 (94%)                | 29 (100%)                | 31 (100%)               | 6 (100%)                |                  |             |
|                                                                                                   | Missing        | 4 (6%)                  |                          |                         |                         |                  |             |
| <b>Total number of lifetime traumas, mean <math>\pm</math> SD (range)</b>                         | Missing in n=3 | 8.4 $\pm$ 3.6<br>(2-18) | 8.23 $\pm$ 3.3<br>(2-16) | 8.5 $\pm$ 3.9<br>(2-18) | 8.7 $\pm$ 3.2<br>(6-15) | $F = 0.065$      | $p = 0.937$ |
